# Supplementary material
Source: MDPI journal article supplement (https://www.mdpi.com/2073-4352/9/2/107)
Supplement: s1 [file s1]

**Table S1.** DALI statistics on structural alignment of *TkTIDE* with and the other structural homologues.

|             | Z-score | RMSD (Å) | Sequence Identity (%) |
|-------------|---------|----------|-----------------------|
| 5NJ9 (TldE) | 35.5    | 2.6      | 21                    |
| 5NJ9 (TldD) | 32.7    | 3.6      | 20                    |
| 1VL4        | 41.1    | 2.1      | 21                    |
| 3TV9        | 35.5    | 2.6      | 20                    |
| 1VPB        | 4.8     | 2.5      | 21                    |
| 3QTD        | 36.5    | 2.4      | 23                    |

The low RMSDs and the high Z-scores indicate that the *TkTldE* structure is the closest to the structure.

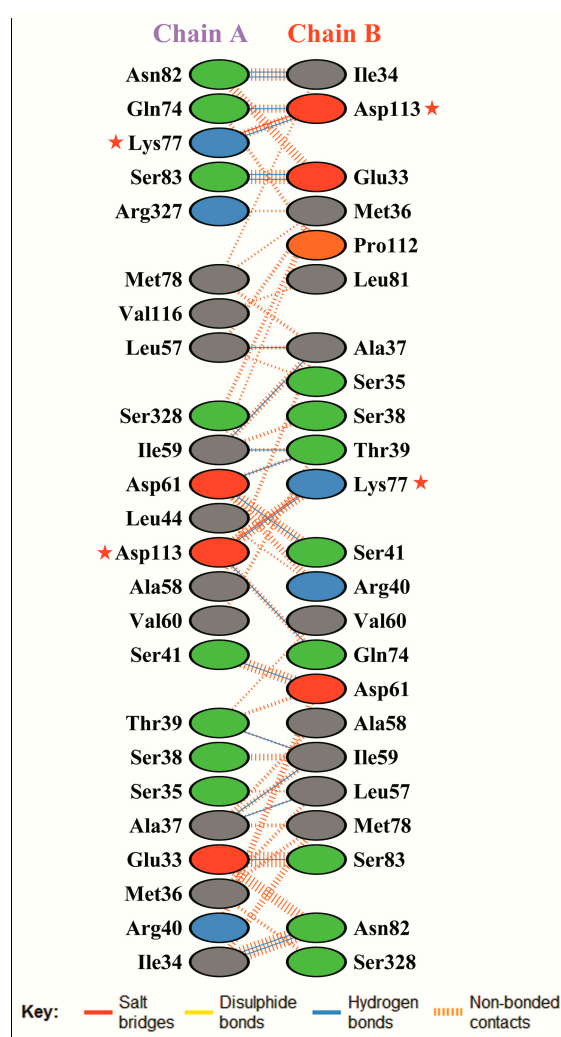

Figure S1. The dimer interface of *TkTldE*. Asp113 and Lys77 forming the salt bridge were labelled by stars. The interaction plot was generated by PDBsum.
